# Supplementary material
Source: PubMed Central journal article supplement (PMC6498012)
Supplement: JCM.01240-18-s0001.pdf [file JCM.01240-18-s0001.pdf]

**Supplemental Table 1: OXA Isolates from the ARISOLATEBANK<sup>a</sup> used in assay development and assay accuracy**

| AR Bank <sup>b</sup> # | Species                        | Oxacillinase | MIC <sup>c</sup> for Meropenem (Interpretation) | Assay Development or Accuracy Assessment |
|------------------------|--------------------------------|--------------|-------------------------------------------------|------------------------------------------|
| 0036                   | <i>Acinetobacter baumannii</i> | OXA-24       | >8 (R)                                          | Development                              |
| 0039                   | <i>Klebsiella pneumoniae</i>   | OXA-181      | 2 (R)                                           | Development                              |
| 0051                   | <i>Klebsiella ozaenae</i>      | OXA-181      | 4 (R)                                           | Accuracy Assessment                      |
| 0063                   | <i>Acinetobacter baumannii</i> | OXA-24       | >8 (R)                                          | Development                              |
| 0066                   | <i>Klebsiella pneumoniae</i>   | OXA-232      | >8 (R)                                          | Accuracy Assessment                      |
| 0074                   | <i>Enterobacter aerogenes</i>  | OXA-48       | 2 (I)                                           | Accuracy Assessment                      |
| 0075                   | <i>Klebsiella pneumoniae</i>   | OXA-232      | >8 (R)                                          | Accuracy Assessment                      |
| 0140                   | <i>Klebsiella pneumoniae</i>   | OXA-181      | 4 (R)                                           | Development                              |
| 0141                   | <i>Klebsiella pneumoniae</i>   | OXA-181      | 4 (R)                                           | Accuracy Assessment                      |
| 0142                   | <i>Klebsiella pneumoniae</i>   | OXA-181      | 2 (I)                                           | Accuracy Assessment                      |
| 0153                   | <i>Klebsiella pneumoniae</i>   | OXA-232      | >8 (R)                                          | Accuracy Assessment                      |
| 0160                   | <i>Klebsiella pneumoniae</i>   | OXA-48       | 8 (R)                                           | Accuracy Assessment                      |

<sup>a</sup><https://www.cdc.gov/drugresistance/resistance-bank/index.html>

<sup>b</sup>ARISOLATEBANK

<sup>c</sup>MIC (minimum inhibitory concentration) in µg/ml

**Supplemental Table 2:** Isolates used in specificity assessment #1

| Isolate                                | Isolate Number <sup>a</sup> | Carbapenemase <sup>b</sup> |
|----------------------------------------|-----------------------------|----------------------------|
| <i>Klebsiella pneumoniae</i>           | MRSN 368320                 | OXA-48                     |
| <i>Escherichia coli</i>                | MRSN 368339                 | OXA-48                     |
| <i>Escherichia coli</i>                | MRSN 368384                 | OXA-48                     |
| <i>Escherichia coli</i>                | MRSN 368393                 | OXA-48                     |
| <i>Enterobacter cloacae</i> complex    | MRSN 489809                 | OXA-48                     |
| <i>Klebsiella pneumoniae</i>           | MRSN 510756                 | OXA-48                     |
| <i>Klebsiella pneumoniae</i>           | MRSN 512213                 | OXA-48                     |
| <i>Klebsiella pneumoniae</i>           | MRSN 520939                 | OXA-48                     |
| <i>Escherichia coli</i>                | MRSN 20486                  | OXA-181                    |
| <i>Klebsiella pneumoniae</i>           | MRSN 368311                 | OXA-232                    |
| <i>Klebsiella pneumoniae</i>           | MRSN 479495                 | OXA-232                    |
| <i>Klebsiella pneumoniae</i>           | MRSN 520948                 | OXA-232                    |
| <i>Klebsiella pneumoniae</i>           | MRSN 546052                 | OXA-232                    |
| <i>Escherichia coli</i>                | MRSN 548014                 | OXA-244                    |
| <i>Escherichia coli</i>                | ECRO91 <sup>c</sup>         | KPC                        |
| <i>Escherichia coli</i>                | ECONIH1 <sup>c</sup>        | KPC                        |
| <i>Enterobacter cloacae</i> complex    | ECNIH5 <sup>c</sup>         | KPC                        |
| <i>Citrobacter freundii</i> complex    | CFNIH1 <sup>c</sup>         | KPC                        |
| <i>Enterobacter cloacae</i> complex    | ECNIH4 <sup>c</sup>         | KPC                        |
| <i>Klebsiella pneumoniae</i>           | BAA-2146 <sup>d</sup>       | NDM                        |
| <i>Escherichia coli</i>                | CCNIH1 <sup>c</sup>         | NDM                        |
| <i>Acinetobacter baumannii</i> complex | CCNIH2 <sup>c</sup>         | NDM                        |
| <i>Klebsiella pneumoniae</i>           | CCNIH3 <sup>c</sup>         | NDM                        |
| <i>Acinetobacter species</i>           | CCNIH4 <sup>c</sup>         | NDM                        |
| <i>Enterobacter cloacae</i> complex    |                             |                            |
| <i>Klebsiella pneumoniae</i>           |                             |                            |
| <i>Pseudomonas aeruginosa</i>          |                             |                            |
| <i>Klebsiella oxytoca</i>              |                             |                            |
| <i>Escherichia coli</i>                |                             |                            |
| <i>Citrobacter koseri</i>              |                             |                            |

<sup>a</sup>Isolates from the Walter Reed Army Institute of Research, Multidrug Resistant Organism Repository and Surveillance Network (WRAIR MRSN)

<sup>b</sup>Presence of carbapenemase was confirmed either by whole genome sequencing or by PCR

<sup>c</sup>Isolates from the National Institutes of Health Clinical Center

<sup>d</sup>Isolate from the American Type Culture Collection

**Supplemental Table 3: Isolates used in specificity assessment #2**

| Isolate                             | Isolate number <sup>a,b</sup> | Carbapenemase <sup>c</sup> |
|-------------------------------------|-------------------------------|----------------------------|
| <i>Klebsiella pneumoniae</i>        | MRSN 368320 <sup>d</sup>      | OXA-48                     |
| <i>Escherichia coli</i>             | MRSN 368339 <sup>d</sup>      | OXA-48                     |
| <i>Escherichia coli</i>             | MRSN 20486 <sup>d</sup>       | OXA-181                    |
| <i>Klebsiella pneumoniae</i>        | MRSN 367311 <sup>d</sup>      | OXA-232                    |
| <i>Klebsiella pneumoniae</i>        | CDC-076                       | VIM-1                      |
| <i>Pseudomonas aeruginosa</i>       | CDC-110                       | VIM-2                      |
| <i>Pseudomonas aeruginosa</i>       | CDC-054                       | VIM-4                      |
| <i>Pseudomonas aeruginosa</i>       | CDC-103                       | IMP-1                      |
| <i>Klebsiella pneumoniae</i>        | CDC-034                       | IMP-4                      |
| <i>Pseudomonas aeruginosa</i>       | CDC-092                       | IMP-14                     |
| <i>Klebsiella pneumoniae</i>        | CDC-046                       | VIM-27                     |
| <i>Stenotrophomonas maltophilia</i> |                               |                            |
| <i>Enterobacter cloacae</i> complex |                               |                            |
| <i>Stenotrophomonas maltophilia</i> |                               |                            |
| <i>Klebsiella pneumoniae</i>        |                               |                            |

<sup>a</sup>CDC isolates from the CDC and FDA Antibiotic Resistant Isolate Bank (ARISOLATEBANK)

<https://www.cdc.gov/drugresistance/resistance-bank/index.html>

<sup>b</sup>Isolates from the Walter Reed Army Institute of Research, Multidrug Resistant Organism Repository and Surveillance Network (WRAIR MRSN)

<sup>c</sup>Presence of carbapenemase was confirmed either by whole genome sequencing or by PCR

<sup>d</sup>OXA-48 family carbapenemase positive isolates also used in specificity assessment #1

**Supplemental Table 4: OXA-48 family as determined from the CARD database<sup>a</sup>**

| Designation | Accession/Version <sup>b</sup> | Length (AA) | Original Organism             |
|-------------|--------------------------------|-------------|-------------------------------|
| OXA-48      | AAP70012.1                     | 265         | <i>Klebsiella pneumoniae</i>  |
| OXA-54      | AAR89917.1                     | 265         | <i>Shewanella oneidensis</i>  |
| OXA-162     | ADG27454.1                     | 265         | <i>Klebsiella pneumoniae</i>  |
| OXA-163     | ADY06444.1                     | 261         | <i>Enterobacter cloacae</i>   |
| OXA-181     | AEP16366.1                     | 265         | <i>Klebsiella pneumoniae</i>  |
| OXA-199     | AFC95894.1                     | 265         | <i>Shewanella xiamenensis</i> |
| OXA-204     | AFU91598.1                     | 265         | <i>Klebsiella pneumoniae</i>  |
| OXA-232     | AGD91915.1                     | 265         | <i>Escherichia coli</i>       |
| OXA-244     | AGC60012.1                     | 265         | <i>Klebsiella pneumoniae</i>  |
| OXA-245     | AGC60013.1                     | 265         | <i>Klebsiella pneumoniae</i>  |
| OXA-247     | AGC70814.1                     | 261         | <i>Klebsiella pneumoniae</i>  |
| OXA-370     | AHF71363.1                     | 265         | <i>Enterobacter sp.</i>       |

<sup>a</sup>Comprehensive Antibiotic Resistance Database

<sup>b</sup>Protein sequences used in the proteomic alignment in which theoretical digestion to identify core peptides conserved throughout the entire OXA-48 family was performed.

**Supplemental Table 5: Results of initial assay optimization**

| Sample <sup>a,b,c,d</sup> | ANQAFLPASTFK<br>(rdotp) <sup>e</sup> /R <sup>f</sup> | YSVVPVYQEFAR<br>(rdotp)/R | Sample    | ANQAFLPASTFK<br>(rdotp)/R | YSVVPVYQEFAR<br>(rdotp)/R |
|---------------------------|------------------------------------------------------|---------------------------|-----------|---------------------------|---------------------------|
| S1 (2 µL)                 | 1/3.73                                               | 1/3.54                    | S1 (4 µL) | 1/3.83                    | 1/3.7                     |
| S2 (2 µL)                 | 0.95/0.03                                            | 0.53/0.004                | S2 (4 µL) | 0.91/0.04                 | 0.61/0.01                 |
| S3 (2 µL)                 | 0.74/0.05                                            | 0.5/0.01                  | S3 (4 µL) | 0.06/0.08                 | 0.46/0.01                 |
| S4 (2 µL)                 | 1/3.49                                               | 1/3.02                    | S4 (4 µL) | 1/3.37                    | 1/2.99                    |
| N1 (2 µL)                 | 0.85/0.03                                            | 0.31/0.02                 | N1 (4 µL) | 0.42/0.06                 | 0.27/0.02                 |
| N2 (2 µL)                 | 0.47/0.02                                            | 0.71/0.01                 | N2 (4 µL) | 0.54/0.02                 | 0.76/0.01                 |
| N3 (2 µL)                 | 0.32/0.01                                            | 0.89/.004                 | N3 (4 µL) | 0.63/0.01                 | 0.69/0.01                 |
| N4 (2 µL)                 | 0.57/0.01                                            | 0.82/0.1                  | N4 (4 µL) | 0.49/0.01                 | 0.79/0.01                 |

<sup>a</sup>S1 (AR Bank #0039), S2 (AR Bank #0063), S3 (AR Bank #0036), S4 (AR Bank #0140)

<sup>b</sup>S1 and S4 (OXA-181 positive)

<sup>c</sup>S2 and S3 (OXA-24 positive)

<sup>d</sup>N1-N4 (negative controls)

<sup>e</sup>rdotp is the ratio dot products

<sup>f</sup>R is the intensity ratio

**Supplemental Figure 1:** Work flow diagram outlining the assay development methods

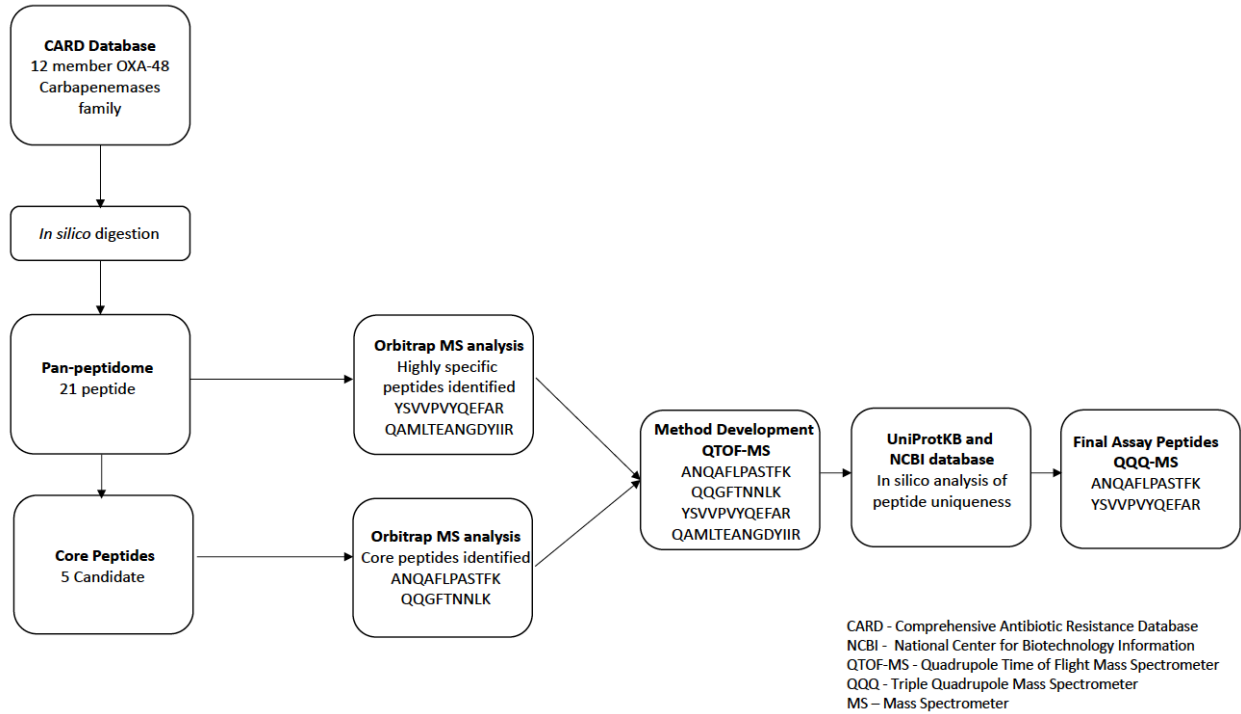

Work flow diagram outlining the assay development methods. The CARD database was used to identify protein sequences for all OXA-48 family enzymes. *In silico* digestion was performed to determine the pan-peptidome and core peptides were identified. Orbitrap LC-MS/MS was used for initial peptide identification, method development was performed on a QTOF LC-MS/MS to identify peptides that were highly responsive and reproducibly detected, and final assay development and accuracy assessment were performed on a QQQ LC-MS/MS

**Supplemental Figure 2:** LC-MS/MS chromatogram of a sample that was called negative on manual review

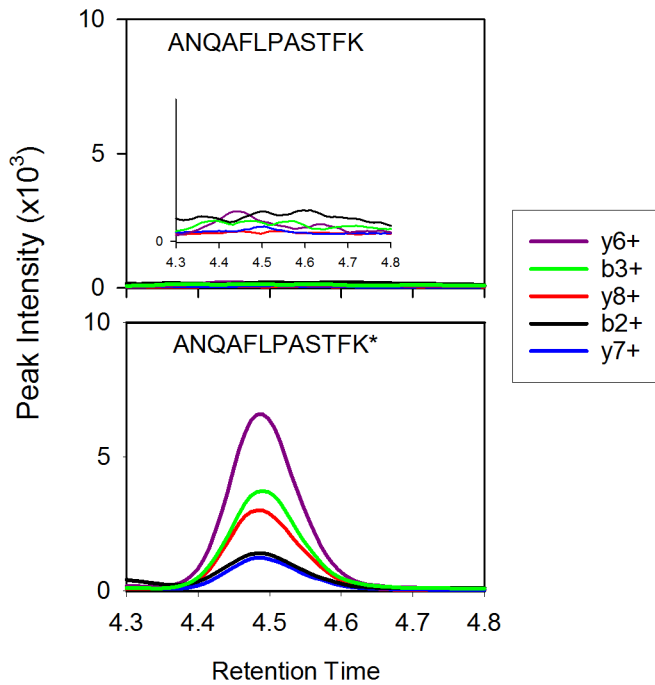

Sample 18 required manual review due to a rdotp of 0.93 for peptide ANQAFLPASTFK. On manual review no clear defined transitions were observed in the unlabelled peptide chromatogram resulting in expert review call of negative.

**Supplemental Figure 3: LC-MS/MS chromatogram of carryover to blank sample**

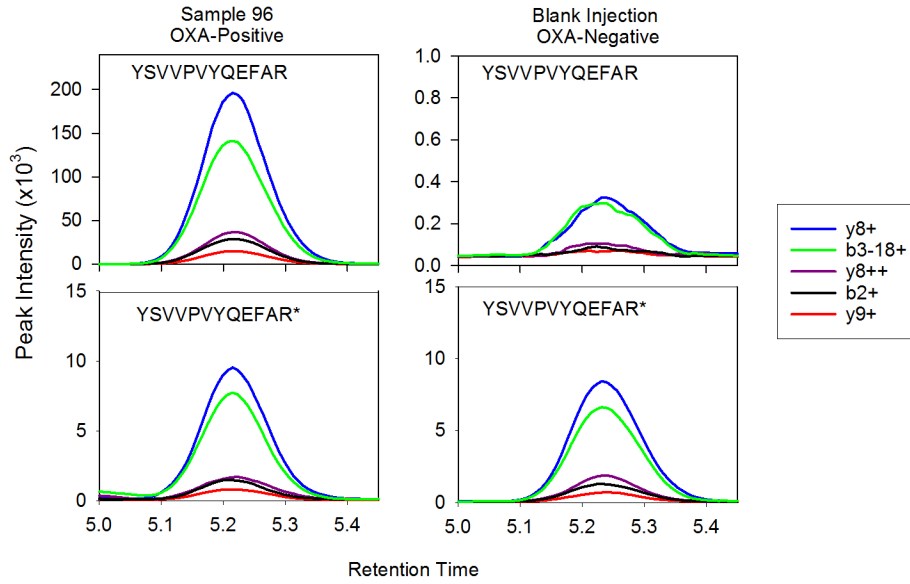

Carryover was noted following sample 96 in the first assay accuracy assessment in which the blank injection had low level peaks that correlated with the correction transitions and transition order for a positive identification.

**Supplemental Figure 4:** LC-MS/MS chromatogram of Sample 26 in the second accuracy assessment demonstrating interfering peak.

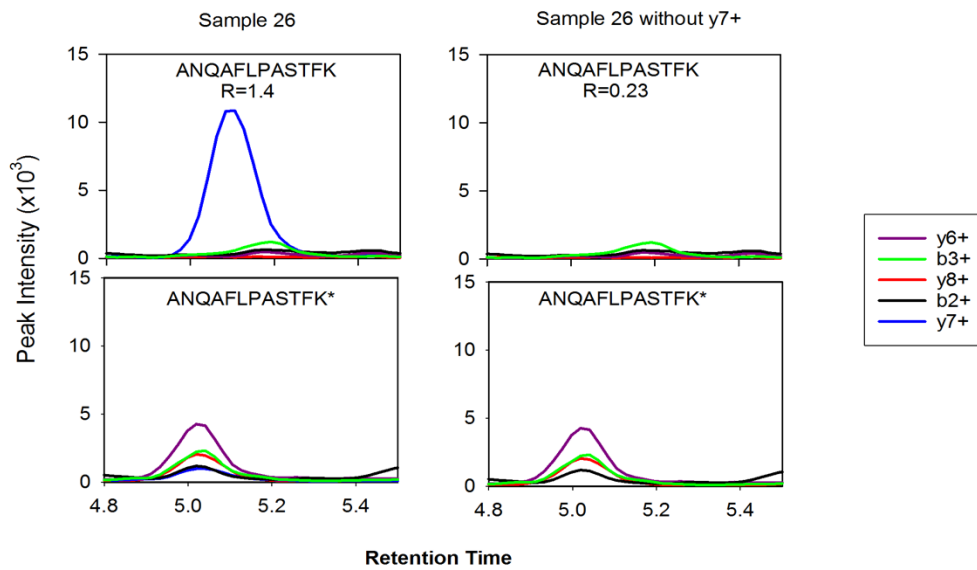

LC-MS/MS chromatogram of Sample 26 in the second accuracy assessment demonstrating interfering peak. Removal of the y7+ peak results in a change in the R-value of 1.4 to 0.23.



**Supplemental Figure 5: Limit of detection quantification with serial dilutions**

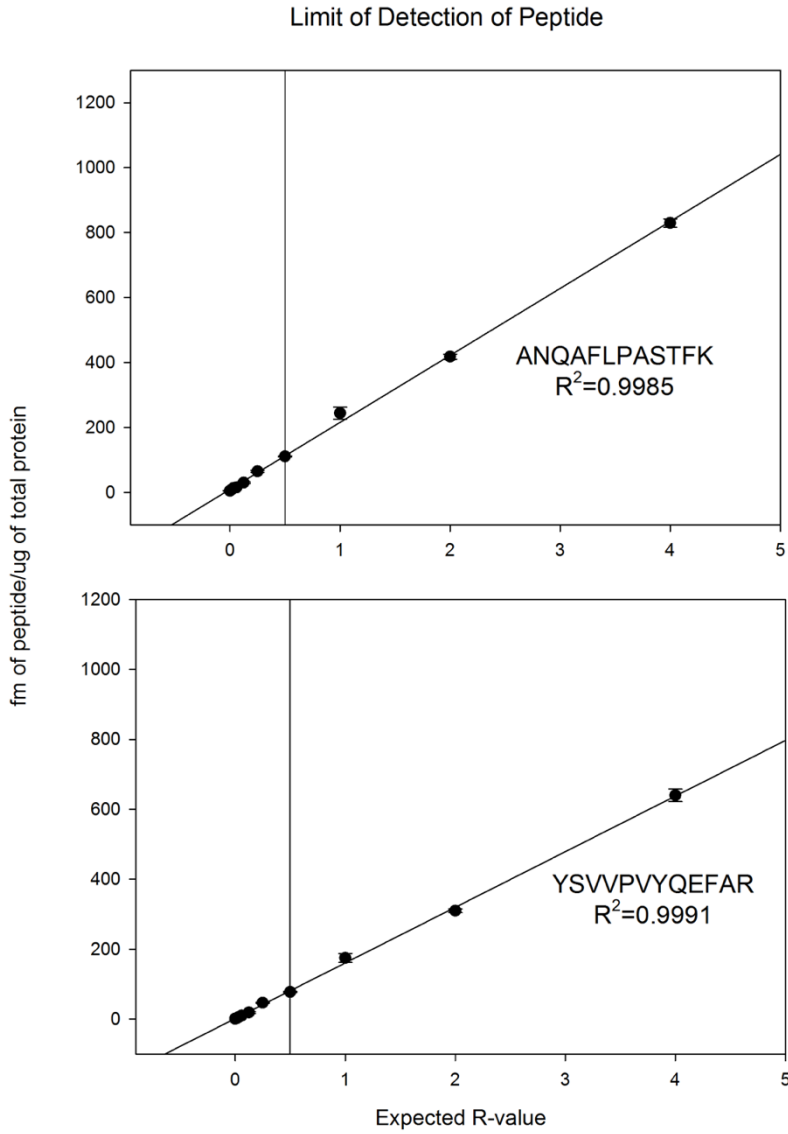

Serial dilutions of an OXA-48 positive sample from an expected R-value of 4 to an expected R-value of 0.015 was performed in duplicate. The peptide concentration/ $\mu\text{g}$  of total protein that correlates with a rdotp of  $>0.95$  and an R value of 0.5 was measured. Peptide concentrations were 110.9 fmol/ $\mu\text{g}$  of total protein for peptide ANQAFLPASTFK and 77.7 fmol/ $\mu\text{g}$  of total protein for peptide YSVVPVYQEFAR. Trend line represents an R-value of 0.5.
